# Supplementary material for: Genome-wide identification and characterization of the superoxide dismutase gene family in Musa acuminata cv. Tianbaojiao (AAA group)
Source: PubMed Central journal article supplement (PMC4615540; doi:10.1186/s12864-015-2046-7), 2015-10-20
Supplement: 12864_2015_2046_MOESM1_ESM.pdf [file 12864_2015_2046_MOESM1_ESM.pdf]

**Additional file 1: Table S1. Oligonucleotide primers used for cloning *MaSOD* genes.**

| Gene name                            | Prime sequences (5' - 3')                   | Tm / °C        | Extension time / s | Purpose                     |
|--------------------------------------|---------------------------------------------|----------------|--------------------|-----------------------------|
| <i>MaCSD1A</i>                       | CSD1A-ORFF: ATGGCAACGGGAGGCAATCTG           | 55.0           | 30 (for ORF),      | ORF/gDNA amplification      |
|                                      | CSD1A-ORFR: TCAAACCTGCTGACTGAAGACC          |                | 140 (for gDNA)     |                             |
|                                      | CSD1A-3RACEF1: GGGTACACGCATGTGAGGGGAA       | 57.0           | 50                 | 3' RACE of <i>MaCSD1A-1</i> |
|                                      | CSD1A-3RACEF2: GATGAGGAACGTCATGCGGGTGAC     | 60.2           | 25                 |                             |
|                                      | CSD1A-3RACEF1: GGGTACACGCATGTGAGGGGAA       | 57.0           | 50                 | 3' RACE of <i>MaCSD1A-2</i> |
|                                      | CSD1A-3RACEF3: TTATGCGGACCAAATTCGGTTCTG     | 58.3           | 25                 |                             |
|                                      | CSD1A-5RACER1: AACCACGACTGCCCTTCCAAAATG     | 58.0           | 30                 | 5' RACE of <i>MaCSD1A-1</i> |
|                                      | CSD1A-5RACER2: CTCCCAGAACC GAATTTGGTCCG     | 58.0           | 30                 | 5' RACE of <i>MaCSD1A-2</i> |
| <i>MaCSD1B</i>                       | CSD1B-ORFF: CACCACTTCTCGAGTCTTCCTC          | 57.0           | 30 (for ORF),      | ORF/gDNA amplification      |
|                                      | CSD1B-ORFR: CATTCCCTCCACTCACAGACTAC         |                | 140 (for gDNA)     |                             |
|                                      | CSD1B-3RACEF1: CACGGTGCCCTGAAGATGACAAT      | 58.0           | 30                 | 3' RACE                     |
|                                      | CSD1B-3RACEF2: GAGCAAGTTGTAGAATTCAGTAGTC    | 57.0           | 15                 |                             |
|                                      | CSD1B-5RACER1: TGCCTCTCTTGATTAATTGTGCTGC    | 56.9           | 35                 | 5' RACE                     |
|                                      | CSD1B-5RACER2: ACTCACAGACTACTGGAATTCTAC     | 58.0           | 18                 |                             |
|                                      | CSD1C-ORFF: CCTGAGATCACGGACGAAGATGG         | 57.0           | 30 (for ORF),      | ORF/gDNA amplification      |
|                                      | CSD1C-ORFR: CTCTATGACAAAACCTCAGCATCCAAC     |                | 130 (for gDNA)     |                             |
| <i>MaCSD1C</i>                       | CSD1C-3RACEF1: GACACCACCAATGGTTGCATGTC      | 56.0           | 30                 | 3' RACE                     |
|                                      | CSD1C-3RACEF2: GATCTTGAAAAGGTGGGCATGAGCTG   | 59.0           | 18                 |                             |
|                                      | CSD1C-5RACER1: CAGCTCATGCCACCTTTTCCAAGATC   | 57.0           | 30                 | 5' RACE                     |
|                                      | CSD1D-ORFF: GAACATGGTTAAGGCTGTAGCTG         | 56.0           | 30 (for ORF),      | ORF/gDNA amplification      |
| CSD1D-ORFR: GCAACTGTACAAGCAGCTTCATCC |                                             | 110 (for gDNA) |                    |                             |
| <i>MaCSD1D</i>                       | CSD1D-3RACEF1: CCATGTTTGACAGCAAGATCGCAC     | 57.0           | 24                 | 3' RACE                     |
|                                      | CSD1D-3RACEF2: GAGTGACTGATCCAAGGGGAATGAT    | 58.0           | 12                 |                             |
|                                      | CSD1D-5RACEF1: CACCAGAATTTCCAGTGGTCTTGC     | 55.9           | 35                 | 5' RACE                     |
|                                      | CSD1D-5RACEF2: CAGTGCCATCGTCTCCAGCTATC      | 58.0           | 27                 |                             |
|                                      | CSD2A-ORFF: ATGCAAGCCACACTCGCCGC            | 58.0           | 40 (for ORF),      | ORF/gDNA amplification      |
| CSD2A-ORFR: GATTGATACTCAAATTAAGTGGC  |                                             | 270 (for gDNA) |                    |                             |
| <i>MaCSD2A</i>                       | CSD2A-3RACEF1: TCGAGCAGCCTATCTCGGCTTC       | 57.0           | 56                 | 3' RACE                     |
|                                      | CSD2A-3RACEF2: CTTTCCCAAGGTCGCCTCCTC        | 58.5           | 48                 |                             |
|                                      | CSD2A-5RACER1: CCAATGAGATGCTAGAAAACATTAGG   | 57.0           | 48                 | 5' RACE                     |
|                                      | CSD2A-5RACER2: GATCATCCTCAAGTTCATGAACCAC    | 58.0           | 34                 |                             |
| <i>MaCSD2B</i>                       | CSD2B-ORFF: GTGCCCTTATCTGTACGCCGCTC         | 58.0           | 40 (for ORF),      | ORF/gDNA amplification      |
|                                      | CSD2B-ORFR: CCATGGGAAGGAGACTGCAACTC         |                | 220 (for gDNA)     |                             |
|                                      | CSD2B-3RACEF1: CCTCTTCCACCGCCAAGCTC         | 57.0           | 54                 | 3' RACE                     |
|                                      | CSD2B-3RACEF2: CAAGCTGCTTCTTTCACAGACGG      | 58.0           | 15                 |                             |
|                                      | CSD2B-5RACER1: GACAACAGGCTTATTAGGTGGCATC    | 57.0           | 60                 | 5' RACE                     |
|                                      | CSD2B-5RACER2: GATCATCCTCTAGTTCATGAACCAC    | 58.0           | 40                 |                             |
| <i>MaMSD1A</i>                       | MSD1A-ORFF: AAAGCTTGTGGGCGATCGGC            | 54.0           | 45 (for ORF),      | ORF/gDNA amplification      |
|                                      | MSD1A-ORFR: TTGATACAGCAGAACAGTGACAAC        |                | 270 (for gDNA)     |                             |
|                                      | MSD1A-3RACEF1: GAAAGCCTTCACAACAGCTTCTGG     | 57.0           | 56                 | 3' RACE                     |
|                                      | MSD1A-3RACEF2: CCCTTCTTGTTCCTGACTAG         | 58.0           | 12                 |                             |
|                                      | MSD1A-5RACER1: TGCCCAGCAAAGGAACCAAGTTG      | 57.0           | 48                 | 5' RACE                     |
|                                      | MSD1A-5RACER2: GACGGAATCCAGAAGCTGTTGTGAAG   | 58.0           | 34                 |                             |
| <i>MaMSD1B</i>                       | MSD1B -ORFF: ATGGCGCTTCGAGCCCTCTTAC         | 57.0           | 45 (for ORF),      | ORF/gDNA amplification      |
|                                      | MSD1B -ORFR: TCAAGCGATCTCGTGCTGTAACCTTAC    |                | 180 (for gDNA)     |                             |
|                                      | MSD1B-3RACEF1: ACTCACTCGAAGCAGCTCTCAG       | 58.0           | 35                 | 3' RACE                     |
|                                      | MSD1B-3RACEF2: ACAGGTGTTGCCATGGCGCTTC       | 61.0           | 23                 |                             |
|                                      | MSD1B-5RACER1: GG TAGTATGCATGCTCCCACACATCG  | 60.0           | 45                 | 5' RACE                     |
|                                      | MSD1C-3RACEF1: CGTCACCAACTACAACAACGCCCTC    | 57.2           | 45                 |                             |
| <i>MaMSD1C</i>                       | MSD1C-3RACEF2: CATATCAACCACTCGATCTTCTGG     | 53.7           | 45                 | 3' RACE                     |
|                                      | MSD1C-5RACER1: CGACAGTGAGCTTCTTAAACCCCTTATC | 56.4           | 42                 |                             |
|                                      | MSD1C-5RACER2: GATTGTCCACCAAGTGAAGTGTGTG    | 58.0           | 42                 |                             |
|                                      | MSD1C-ORFF: ATGGCTCTCCGACCCCTCTTC           | 56.4           | 42 (for ORF),      | ORF/gDNA amplification      |
| MSD1C-ORFR: TCAGGCGGTCTCCTTCTCATAAC  |                                             | 280 (for gDNA) |                    |                             |
| <i>MaMSD1D</i>                       | MSD1D-ORFF1: ATGGCTCTCCGAACCCCTCTTC         | 56.0           | 42 (for ORF),      | ORF/gDNA amplification      |
|                                      | MSD1D-ORFR1: TTATGCAGTCTCTTCTCATAACTTAC     |                | 190 (for gDNA)     |                             |
|                                      | MSD1D-3RACEF1: GCCTTGGATTGGGTCTCGGC         | 57.0           | 48                 | 3' RACE                     |

|                |                                            |      |                |                                |
|----------------|--------------------------------------------|------|----------------|--------------------------------|
|                | MSD1C-3RACEF2: TCCACTGGTGACAAAAGGTTTGC     | 58.0 | 24             |                                |
|                | MSD1D-5RACER1: CACGACCGGAAGAGAATGAAAGC     | 57.0 | 48             | 5' RACE                        |
|                | MSD1D-5RACER2: ACCAAGCAAAGGAACCATGTGCAAAC  | 58.0 | 42             |                                |
|                | FSD1A-ContrF: GARTWYCAYTGGGGRAAGCAYCA      | 57.0 | 30             | Conserved region amplification |
|                | FSD1A-ContrR: GTARTARGCRTGCTCCCAWACATC     |      |                |                                |
|                | FSD1A-3RACEF1: CATCTGGAAGGCTTATGGAACATC    | 56.0 | 35             | 3' RACE                        |
| <i>MaFSD1A</i> | FSD1A-3RACEF2: CTGGTTGGGCTTGGCTTGCTAC      | 60.0 | 30             |                                |
|                | FSD1A-5RACER1: GATAGTAAGCGTGCTCCAGACATCG   | 60.0 | 45             | 5' RACE                        |
|                | FSD1A-ORFF1: ATGCAGCATCATACTCTTCCTGTTG     | 55.0 | 55 (for ORF),  | ORF/gDNA amplification         |
|                | FSD1A-ORFR: TCATTCAGCCTCCGAATCATCG         |      | 240 (for gDNA) |                                |
|                | FSD1B-3RACEF1: GGTTGCACAATGGAGGAGCTTATC    | 56.0 | 57             | 3' RACE                        |
|                | FSD1B-3RACEF2: CTTCTGGAATCAATGCAACCTAATGG  | 56.0 | 53             |                                |
| <i>MaFSD1B</i> | FSD1B-5RACER1: CCATTAGGTTGCATTGATTCCCAGAAG | 56.0 | 32             | 5' RACE                        |
|                | FSD1B-5RACER2: GATAAGCTCCTCCATTGTGCAACC    | 56.0 | 25             |                                |
|                | FSD1B-ORFF: ATCCGCCGTCGTCTACGC             | 56.2 | 60 (for ORF),  | ORF/gDNA amplification         |
|                | FSD1B-ORFR: GTCTCCATAAGATATAACTTTCGCTTC    |      | 250 (for gDNA) |                                |
|                | AUAP: GGCCACGCGTCGACTAGTAC                 | -    | -              | Universal primer for 3' RACE   |
|                | 10UPM: CTAATACGACTCACTATAGGGCAAGCAGTGGTAT  | -    | -              |                                |
|                | CAACGCAGAGTACATGGGG                        |      |                | Universal primer for 5' RACE   |
|                | NUPM: AAGCAGTGGTATCAACGCAGAGT              |      |                |                                |

---
