# Supplementary material for: Genome-wide identification and characterization of the superoxide dismutase gene family in Musa acuminata cv. Tianbaojiao (AAA group)
Source: PubMed Central journal article supplement (PMC4615540; doi:10.1186/s12864-015-2046-7), 2015-10-20
Supplement: 12864_2015_2046_MOESM2_ESM.pdf [file 12864_2015_2046_MOESM2_ESM.pdf]

**Additional file 2: Table S2. Oligonucleotide primers used for cloning the 5'- flanking regions of *MaSOD* genes.**

| Gene name      | Prime sequences (5'-3')                 | Tm / °C | Promoter length / bp |
|----------------|-----------------------------------------|---------|----------------------|
| <i>MaCSD1A</i> | CSD1A-proF: GACCACTCTACAAGACCGTCG       | 57.5    | 2007                 |
|                | CSD1A-proR: GATCGCCACGCCCTTCAGATTG      |         |                      |
| <i>MaCSD1B</i> | CSD1B-proF: CTTTGATATCGACGGTAACTATCGAGC | 58.0    | 2005                 |
|                | CSD1B-proR: CATCCTCACTGCCACCAAGAAC      |         |                      |
| <i>MaCSD1C</i> | CSD1C-proF: CTCAATACAGTTGATCATTTCATCAC  | 57.0    | 1565                 |
|                | CSD1C-proR: GCCCTTGACGCTATCACTGCTAC     |         |                      |
| <i>MaCSD1D</i> | CSD1D-proF: GCTTTCATTACGCACTCCATTGC     | 56.4    | 2114                 |
|                | CSD1D-proR: CAGCTACAGCCTTAACCATGTTC     |         |                      |
| <i>MaCSD2A</i> | CSD2A-proF: TAGGGTCTTTGTTTGAAGGTGAATC   | 56.0    | 1986                 |
|                | CSD2A-proR: TGTGGCTTGCATCAACCCGAAG      |         |                      |
| <i>MaMSD1A</i> | MSD1A-proF: CAATTCATAGTACATAGGATCATGGC  | 55.0    | 2077                 |
|                | MSD1A-proR: AATCCAGAAGCTGTTGTGAAGGC     |         |                      |
| <i>MaMSD1B</i> | MSD1B-proF: AACTTTCTCAAATCCATTCCAATCGTC | 57.0    | 1977                 |
|                | MSD1B-proR: AAGCTAGGGTTGCGGCTGTCTTC     |         |                      |
| <i>MaMSD1C</i> | MSD1C-proF: CTGATAAAAGGTGCATCTGTGTCAGC  | 58.0    | 2052                 |
|                | MSD1C-proR: TTGGTGAAGAGGGTCCGGAGAG      |         |                      |
| <i>MaMSD1D</i> | MSD1D-proF: CGTGAAGCATCTGCTCAAATGTTGC   | 58.5    | 2044                 |
|                | MSD1D-proR: AGGCTCGAGTTAGGGCTTTCTTG     |         |                      |
| <i>MaFSD1A</i> | FSD1A-proF: GGCACTACTGACGTGACGTGTG      | 58.0    | 1973                 |
|                | FSD1A-proR: CAACAGGAAAGAGTATGATGCTGCA   |         |                      |
| <i>MaFSD1B</i> | FSD1B-proF: CAACTCCATTTCACATTCAGCAGTAG  | 57.0    | 1084                 |
|                | FSD1B-ORFR:GTCTCCATAAGATATAACTTTCGCTTC  |         |                      |
