# Supplementary material for: Genome-wide identification and characterization of the superoxide dismutase gene family in Musa acuminata cv. Tianbaojiao (AAA group)
Source: PubMed Central journal article supplement (PMC4615540; doi:10.1186/s12864-015-2046-7), 2015-10-20
Supplement: 12864_2015_2046_MOESM3_ESM.pdf [file 12864_2015_2046_MOESM3_ESM.pdf]

**Additional file 3: Table S3. Specific primers used for quantitative real-time PCR.**

| Gene name      | Primer (5'-3')                    | Amplicon<br>/ bp | T <sub>m</sub><br>/ °C |
|----------------|-----------------------------------|------------------|------------------------|
| <i>MaCSD1A</i> | CSD1A-QF:CATATGCACGAACCACTGTC     | 140              | 57                     |
|                | CSD1A-QR:GGCTCATCATTACAAGAGGTCTA  |                  |                        |
| <i>MaCSD1B</i> | CSD1B-QF:CTCCAAGGTTGAGCAAGTTG     | 129              | 57                     |
|                | CSD1B-QR:CTAATAAGGAAAAGGAAGCATAGG |                  |                        |
| <i>MaCSD1C</i> | CSD1C-QF:GCCGATCCAGATGATCTTG      | 137              | 57                     |
|                | CSD1C-QR:ACCTCACCATCCAACCAATAG    |                  |                        |
| <i>MaCSD1D</i> | CSD1D-QF:TCAGGAGTGACTGATCCAAGG    | 150              | 57                     |
|                | CSD1D-QR:AGCCAAAGAAAAGAAGCCATC    |                  |                        |
| <i>MaCSD2A</i> | CSD2A-QF:GAAATGCTGGAGGAAGATTGG    | 131              | 57                     |
|                | CSD2A-QR:CCATTAGGTTTCATCGACTTGG   |                  |                        |
| <i>MaCSD2B</i> | CSD2B-QF:TGCTTCTTTCACAGACGGTG     | 175              | 57                     |
|                | CSD2B-QR:AACAGGCTTATTAGGTGGCATC   |                  |                        |
| <i>MaMSD1A</i> | MSD1A-QF:GAAGTTTTTCGATGAAGAGACTGC | 103              | 57                     |
|                | MSD1A-QR:TTGATACAGCAGAACAGTGACAAC |                  |                        |
| <i>MaMSD1B</i> | MSD1B-QF:TGCCAGTGAAGTTTATGACAGC   | 156              | 57                     |
|                | MSD1B-QR:CCAGGTGACATACTGATGGTG    |                  |                        |
| <i>MaMSD1C</i> | MSD1C-QF:GTGAATTTTCCGGCATGTAA     | 148              | 57                     |
|                | MSD1C-QR:CAGGGCATGAACAAGTAGTGAC   |                  |                        |
| <i>MaMSD1D</i> | MSD1D-QF:TTGCTTTCATTCTCTTCCCG     | 132              | 57                     |
|                | MSD1D-QR:CCTGGGGCATTGATAGATACTG   |                  |                        |
| <i>MaFSD1A</i> | FSD1A-QF:CTCCAAGGTTGAGCAAGTTG     | 149              | 57                     |
|                | FSD1A-QR:CTAATAAGGAAAAGGAAGCATAGG |                  |                        |
| <i>MaFSD1B</i> | FSD1B-QF:CGTTACAAAGGTTCTGGCATACTA | 168              | 57                     |
|                | FSD1B-QR:CAACCATAACAATGGGCTGTTA   |                  |                        |
| <i>MaCAC</i>   | CAC-QF:AACTCCTATGTTGCTCGCTTATG    | 148              | 57                     |
|                | CAC-QR:GGCTACTACTTCGGTTCCTTTCAC   |                  |                        |
