# Supplementary material for: Genome-wide identification and characterization of the superoxide dismutase gene family in Musa acuminata cv. Tianbaojiao (AAA group)
Source: PubMed Central journal article supplement (PMC4615540; doi:10.1186/s12864-015-2046-7), 2015-10-20
Supplement: 12864_2015_2046_MOESM4_ESM.pdf [file 12864_2015_2046_MOESM4_ESM.pdf]

**Additional file 4: Table S4. Information of *SOD* genes from the wild and cultivated bananas.**

| <i>Musa acuminata</i> var. DH-Pahang (AA group) |     |                  | <i>Musa balbisiana</i> var. PKW (BB group) |                    |                           | <i>Musa acuminata</i> cv. Tianbaojiao (AAA group) |         |                           |                           |
|-------------------------------------------------|-----|------------------|--------------------------------------------|--------------------|---------------------------|---------------------------------------------------|---------|---------------------------|---------------------------|
| Locus ID                                        | chr | ORF, bp          | Locus ID                                   | ORF, bp            | Identity <sup>c</sup> , % | Gene name                                         | ORF, bp | Identity <sup>d</sup> , % | Identity <sup>e</sup> , % |
| GSMUA_Achr4T06850_001                           | 4   | 483              | ITC1587_Bchr4_T08984                       | 597                | 65.56                     | <i>MaCSD1A</i>                                    | 483     | 98.76                     | 63.47                     |
| GSMUA_Achr2T02380_001                           | 2   | 459              | ITC1587_Bchr2_T03311                       | 5067 <sup>b1</sup> | 8.64                      | <i>MaCSD1B</i>                                    | 459     | 99.56                     | 8.66                      |
| GSMUA_Achr7T03680_001                           | 7   | 459              | ITC1587_Bchr7_T18882                       | 459                | 95.42                     | <i>MaCSD1C</i>                                    | 459     | 99.35                     | 95.67                     |
| GSMUA_Achr8T09910_001                           | 8   | 447 <sup>a</sup> | ITC1587_Bchr8_T22308                       | 3204 <sup>b2</sup> | 10.31                     | <i>MaCSD1D</i>                                    | 459     | 83.82                     | 10.69                     |
| GSMUA_Achr9T20410_001                           | 9   | 690              | ITC1587_Bchr9_T27285                       | 681                | 78.63                     | <i>MaCSD2A</i>                                    | 684     | 96.52                     | 81.30                     |
| GSMUA_Achr10T06740_001                          | 10  | 651              | ITC1587_Bchr10_T29543                      | 633                | 94.93                     | <i>MaCSD2B</i>                                    | 675     | 95.41                     | 91.59                     |
| GSMUA_Achr8T21350_001                           | 8   | 717              | ITC1587_Bchr8_T23906                       | 729                | 80.66                     | <i>MaMSD1A</i>                                    | 717     | 99.44                     | 79.52                     |
| GSMUA_Achr3T18000_001                           | 3   | 732              | ITC1587_Bchr3_T07100                       | 855                | 83.86                     | <i>MaMSD1B</i>                                    | 732     | 99.32                     | 83.51                     |
| GSMUA_Achr2T18870_001                           | 2   | 738              | ITC1587_Bchr2_T04759                       | 741                | 97.98                     | <i>MaMSD1C</i>                                    | 738     | 98.78                     | 97.84                     |
| GSMUA_Achr3T09840_001                           | 3   | 726              | ITC1587_Bchr3_T06055                       | 837                | 85.19                     | <i>MaMSD1D</i>                                    | 732     | 98.63                     | 85.66                     |
| GSMUA_Achr11T23560_001                          | 11  | 906              | ITC1587_Bchr11_T34129                      | 780                | 82.12                     | <i>MaFSD1A</i>                                    | 906     | 98.90                     | 83.00                     |
| GSMUA_Achr10T27190_001                          | 10  | 783              | ITC1587_Bchr10_T31275                      | 1491               | 28.09                     | <i>MaFSD1B</i>                                    | 783     | 99.74                     | 28.15                     |
| GSMUA_Achr10T27220_001                          | 10  | 783              | ITC1587_Bchr10_T31280                      | 1275               | 52.81                     |                                                   |         | 98.85                     | 52.35                     |

a: This gene is annotated as partial sequence in the 'DH-Pahang' genome database.

b1: A chimeric gene contains fragments of *Cu/ZnSOD* and dnaj heat shock domain.

b2: A chimeric gene contains fragments of *Cu/ZnSOD* and pentatricopeptide repeat-containing protein.

c: ORF identity of the *SOD* genes from the two wild bananas.

d: ORF identity of *MaSODs* and 'DH-Pahang' *SOD* genes.

e: ORF identity of *MaSODs* and 'PKW' *SOD* genes.

Length differences of the ORFs among bananas are marked in colors.
