# Supplementary material for: Genome-wide identification and characterization of the superoxide dismutase gene family in Musa acuminata cv. Tianbaojiao (AAA group)
Source: PubMed Central journal article supplement (PMC4615540; doi:10.1186/s12864-015-2046-7), 2015-10-20
Supplement: 12864_2015_2046_MOESM5_ESM.pdf [file 12864_2015_2046_MOESM5_ESM.pdf]

**Additional file 5: Figure S1. Sequence alignment of *MaFSD1B* and *MaFSD1B-variant1*. Start and termination codons are showed in red box. Two extra sequences are marked in mazarine.**

```

MaFSD1B-variant1 ATGGCCATGGCGCTCCCCCTCGCCTATGCGTCCTCCGTCGTGCATCCTTTTGAAGCAGGAAGGCTATCTTTTCAGCACCAAGGCC 84
MaFSD1B          ATGGCCATGGCGCTCCCCCTCGCCTATGCGTCCTCCGTCGTGCATCCTTTTGAAGCAGGAAGGCTATCTTTTCAGCACCAAGGCC 84

MaFSD1B-variant1 ACCAAGCATAAGAAACAGATATATCAGTTCGGAACGTTACAAAGGTTCTGGCATACTATGGCCTAACAAACCCCTCCGTATAAA 168
MaFSD1B          ACCAAGCATAAGAAACAGATATATCAGTTCGGAACGTTACAAAGGTTCTGGCATACTATGGCCTAACAAACCCCTCCGTATAAA 168

MaFSD1B-variant1 CTAGATGCATTGGAACCATACATGAGCAGGAGGACGCTGGAACCTGCACTGGGGCAATATTCATCGAGGTTATTTCAGATAGCTTG 252
MaFSD1B          CTAGATGCATTGGAACCATACATGAGCAGGAGGACGCTGGAACCTGCACTGGGGCAATATTCATCGAGGTTATTTCAGATAGCTTG 252

MaFSD1B-variant1 AATAAGCAGCTTGCTAACAGCCCATTGTATGGTTGCACAATGGAGGAGCTTATTTAAACACATTCAACAATGGCAACCCATTA 336
MaFSD1B          AATAAGCAGCTTGCTAACAGCCCATTGTATGGTTGCACAATGGAGGAGCTTATTTAAACACATTCAACAATGGCAACCCATTA 336

MaFSD1B-variant1 CCAGAATATAATAATGCTGCCGAGGTTTGGAAACCATGATTCTTCTGGGAATCAATGCAACCTAATGGTGGAAAGGTTGCCATGG 420
MaFSD1B          CCAGAATATAATAATGCTGCCGAGGTTTGGAAACCATGATTCTTCTGGGAATCAATGCAACCTAATGGTGGAAAGGTTGCCATGG 420

MaFSD1B-variant1 GGAGGTGTGCTTGACCAGATTGAAAAGGACTTTGGTTCATTCTCTAACTCCGAGATGAATTTGTACATTAGCTATGATGCTT 504
MaFSD1B          GGAGGTGTGCTTGACCAGATTGAAAAGGACTTTGGTTCATTCTCTAACTCCGAGATGAATTTGTACATTAGCTATGATGCTT 504

MaFSD1B-variant1 TTCGGATCTGGCTGGGTGTGGCTTGCTTGTGAAAACCAATGAAAGAAGACTTTCGATAGTTAGAACATCAAATGCACCTTTGTCCA 588
MaFSD1B          TTCGGATCTGGCTGGGTGTGGCTTGCTTGTGAAAACCAATGAAAGAAGACTTTCGATAGTTAGAACATCAAATGCACCTTTGTCCA 588

MaFSD1B-variant1 CTTGTTTGGGGTGATATTCCAATCATCAGCCTGGACATGTGGGAGGTAAGTAAGCTGAATACATATATCATCTCATTAACATG 672
MaFSD1B          CTTGTTTGGGGTGATATTCCAATCATCAGCCTGGACATGTGGGAG..... 633

MaFSD1B-variant1 ATGCTGCAAGACTAATGATCTTCCTCCTTTGCTTTTGAATTATGGCAGCATGCATATTACTTGGACTACAAGGTTATTCAGATA 756
MaFSD1B          .....CATGCATATTACTTGGACTACAAG..... 657

MaFSD1B-variant1 TTTTCTGCTAACAGTGATCATTGAATCCAAGACATTTCTTATCTTGCTGAAAAGTAATTTTAGTATCATTGCATATGGAAAG 840
MaFSD1B          ..... 657

MaFSD1B-variant1 TTGCAGAAAGATCAAATTAGTTTAATCTFACTTCTTTTACAACAATCTTTTATTCTGAATAATTTCTTTGAGCAGGATGACGT 924
MaFSD1B          .....GATGACGT 665

MaFSD1B-variant1 GAGCAAATATGTTAATAAATTCATGGACCATCTTATCTCCTGGCATTGAGCCACAGCAGTATGGTTCGTGCTGAGGCTTTTGT 1008
MaFSD1B          GAGCAAATATGTTAATAAATTCATGGACCATCTTATCTCCTGGCATTGAGCCACAGCAGTATGGTTCGTGCTGAGGCTTTTGT 749

MaFSD1B-variant1 AAATCTTGAGAGCCAAAGATTCCAGTTGCATGA 1042
MaFSD1B          AAATCTTGAGAGCCAAAGATTCCAGTTGCATGA 783

```
