# Supplementary material for: Genome-wide identification and characterization of the superoxide dismutase gene family in Musa acuminata cv. Tianbaojiao (AAA group)
Source: PubMed Central journal article supplement (PMC4615540; doi:10.1186/s12864-015-2046-7), 2015-10-20
Supplement: 12864_2015_2046_MOESM6_ESM.pdf [file 12864_2015_2046_MOESM6_ESM.pdf]

**Additional file 6: Table S5. Pairwise identity of the coding region cDNAs and deduced amino acids of *MaSOD* genes.**

|                                                            |           | Pairwise identity of nucleotide acid (%) |                |                |                |                |                |                |                |                |                |                |                |
|------------------------------------------------------------|-----------|------------------------------------------|----------------|----------------|----------------|----------------|----------------|----------------|----------------|----------------|----------------|----------------|----------------|
|                                                            |           | <i>MaCSD1A-1</i>                         | <i>MaCSD1B</i> | <i>MaCSD1C</i> | <i>MaCSD1D</i> | <i>MaCSD2A</i> | <i>MaCSD2B</i> | <i>MaMSD1A</i> | <i>MaMSD1B</i> | <i>MaMSD1C</i> | <i>MaMSD1D</i> | <i>MaFSD1A</i> | <i>MaFSD1B</i> |
| Pairwise<br>identity of<br>deduced<br>amino<br>acid<br>(%) | MaCSD1A-1 | -                                        | 57.4           | 58.8           | 57.4           | 42.0           | 43.2           | 22.3           | 21.0           | 23.5           | 20.8           | 18.1           | 20.3           |
|                                                            | MaCSD1B   | 61.3                                     | -              | 82.8           | 73.0           | 42.7           | 43.6           | 20.8           | 20.1           | 20.6           | 20.5           | 18.4           | 20.7           |
|                                                            | MaCSD1C   | 60.6                                     | 87.5           | -              | 71.5           | 42.3           | 42.8           | 21.5           | 23.3           | 23.3           | 22.2           | 18.0           | 18.9           |
|                                                            | MaCSD1D   | 55.6                                     | 71.7           | 71.1           | -              | 42.0           | 42.1           | 21.4           | 19.6           | 19.1           | 21.2           | 18.0           | 14.8           |
|                                                            | MaCSD2A   | 39.7                                     | 42.3           | 41.6           | 40.1           | -              | 83.7           | 32.5           | 29.6           | 33.0           | 29.1           | 27.1           | 20.2           |
|                                                            | MaCSD2B   | 40.6                                     | 42.4           | 43.3           | 39.7           | 75.8           | -              | 30.8           | 32.3           | 31.9           | 32.9           | 25.6           | 23.3           |
|                                                            | MaMSD1A   | 9.9                                      | 8.7            | 9.9            | 11.8           | 15.7           | 15.0           | -              | 80.9           | 84.8           | 85.0           | 31.3           | 33.8           |
|                                                            | MaMSD1B   | 11.3                                     | 10.6           | 11.0           | 9.9            | 15.1           | 13.9           | 81.9           | -              | 81.7           | 81.0           | 32.7           | 35.6           |
|                                                            | MaMSD1C   | 12.1                                     | 9.1            | 11.3           | 10.1           | 15.0           | 13.0           | 86.1           | 82.0           | -              | 85.9           | 33.6           | 28.9           |
|                                                            | MaMSD1D   | 11.7                                     | 10.8           | 10.8           | 14.4           | 14.7           | 13.2           | 84.6           | 81.1           | 86.5           | -              | 32.6           | 28.8           |
|                                                            | MaFSD1A   | 8.4                                      | 6.6            | 6.3            | 8.5            | 10.6           | 11.9           | 22.7           | 18.1           | 24.0           | 23.4           | -              | 42.5           |
|                                                            | MaFSD1B   | 10.8                                     | 9.85           | 9.6            | 9.7            | 13.2           | 12.1           | 22.6           | 23.6           | 24.9           | 24.9           | 33.3           | -              |

Pairwise identities of *MaSODs* in the same type are marked in colors.
