# Supplementary material for: Genome-wide identification and characterization of the superoxide dismutase gene family in Musa acuminata cv. Tianbaojiao (AAA group)
Source: PubMed Central journal article supplement (PMC4615540; doi:10.1186/s12864-015-2046-7), 2015-10-20
Supplement: 12864_2015_2046_MOESM7_ESM.pdf [file 12864_2015_2046_MOESM7_ESM.pdf]

**Additional file 7:Table S6. Motif sequences of *MaSODs* identified by MEME tools.** Cu/ZnSOD signatures (GFH[VL]H[EA][FL]GD<sup>TT</sup> and GNAG[GA]R[VL]ACG) are underline, Cu<sup>2+</sup> binding sites and Zn<sup>2+</sup> binding sites are in box and red box, respectively. The conserved metal-binding domain “DVWEHAYY” for MnSOD or FeSOD are in green box. Five residues that are present only in MnSOD and absent from FeSOD are in blue box. Residues important for distinguishing FeSOD from MnSOD are in grey.

| Motif  | Consensus sequence                                                                                                                                                                                                                                                                                               | Known motif description          |
|--------|------------------------------------------------------------------------------------------------------------------------------------------------------------------------------------------------------------------------------------------------------------------------------------------------------------------|----------------------------------|
| Motif1 | GPTTV[NT][GV]R[IV][ST]GL[KT]PGLHGFH[VL]H[EA][FL]GD <sup>TT</sup> NGC<br>[MI]STG[PA]H[FNPx][GK][KM][ET]HGAPEDEV <sup>R</sup> HAGDLGN[IV][VT]A<br>[GN]EDG[TV][AV][ET][AF][TS][IK]VD[SN]QIPLSGPNS[IV][IV]GRA<br>VVVH[AE][DL][PE]DDL <sup>G</sup> [KR]GGHEL <sup>S</sup> [KL][TS]TGNAG[GA]R[VL]AC<br>G[IV][IV]GL[OT] | Cu/ZnSOD                         |
| Motif2 | KGD[AV][PST]AVVRLQ[SG]AIKFN <sup>GG</sup> GHINHSIF <sup>W</sup> [KN]NLKPV[NK]EG<br>GGEPPH[SA][TAS]LGW[AT]IDTDF[GC]SLEALVQKMNAEGAALOGSGW<br>VWLALDK[GE][SFR]KKL[CLST]VE[TA]TAN <sup>OD</sup> PLVTKG[AL][NH][LM]V<br>PLLGI <sup>DVWEHAYY</sup> LQYKNV[RK]PDYLKNIW[KDS]V[IM][ND]WKYASEV<br>[YF][DE][KES]E           | MnSOD                            |
| Motif3 | [GF]LRQARGL[TA]VAALPD[LP]PYD[YL]GALEPA[IM]S[GR]E[IT][ML]<br>[RE]LH[HW][OG][KR]HH[QR]AYVT[NS][YL]NNAL[EA]QL[ED]                                                                                                                                                                                                   |                                  |
| Motif4 | [CM][GT][LM][DE]E[IL][IV][KV][TV][ST][FY]N[KN]GNPLP[EL][FY]<br>[NV][HN]AA[EQ]V <sup>W</sup> NHD <sup>F</sup> FW[EQ]S[IM][KQ]P[GN]GG[GR][LR]P[SW]<br>G[GR][LV][LM][DE][HQ]IE[KR]DFGSF[DS][NR][FM][LR][DE]EF[KV]<br>[HR][AS]A[LM][MT][LQ]FGSGW[AV]WL <sup>V</sup> [LY]K[AT]N                                       |                                  |
| Motif5 | AV[AV]VL[GK][GS][NST][ESD][DSG]V[EKG]G[VT][VI][YT][FL][SVA]OE                                                                                                                                                                                                                                                    |                                  |
| Motif6 | M[AS]LR[TA]LF[TS]K[KT][AS][LAF][TA][LRT]AS[GA][FL][GR]P                                                                                                                                                                                                                                                          | Mitochondrial location<br>signal |
| Motif7 | [CN]P[IL]VW[DG][DY][IS]P[IL][IL][AS][IL] <sup>D[<u>MV</u>]WEHAYY</sup> LDY<br>[EK][DN][DR][RV][AS][DK]YV[NS][IN]F[LM][DE][HK]L[IV]SW                                                                                                                                                                             |                                  |
| Motif8 | MQA[IT]LAAAM[AP]A[HO]T[LV]L[FL]SASS                                                                                                                                                                                                                                                                              | Chloroplast location signal      |
| Motif9 | [MS]A[LR]PL[AL][RY][AS][AS][LS][LV][GV][HO]PF[ER][AC][GL][PR][FL]S<br>F                                                                                                                                                                                                                                          | Chloroplast location signal      |

Significant motifs (p-value<1e-100) of more than 20 amino acid length are predicted by MEME search.
