# Supplementary material for: Genome-wide identification and characterization of the superoxide dismutase gene family in Musa acuminata cv. Tianbaojiao (AAA group)
Source: PubMed Central journal article supplement (PMC4615540; doi:10.1186/s12864-015-2046-7), 2015-10-20
Supplement: 12864_2015_2046_MOESM8_ESM.pdf [file 12864_2015_2046_MOESM8_ESM.pdf]

**Additional file 8: Table S7. Potential functional SOD family genes identified *in silico* in monocot plants.**

| Species name                           | <i>Cu/ZnSOD</i> genes |           | <i>MnSOD</i> genes  |           | <i>FeSOD</i> genes  |           | Websites for genome sequences downloading <sup>a</sup>                                                                                                          |
|----------------------------------------|-----------------------|-----------|---------------------|-----------|---------------------|-----------|-----------------------------------------------------------------------------------------------------------------------------------------------------------------|
|                                        | Locus ID              | Total NO. | Locus ID            | Total NO. | Locus ID            | Total NO. |                                                                                                                                                                 |
| <i>Oryza sativa</i><br>(ssp. japonica) | LOC_Os03g22810        | 4         | LOC_Os05g25850      | 1         | LOC_Os06g02500      | 2         | <a href="http://phytozome.jgi.doe.gov/pz/portal.html#!info?alias=Org_Osativa">http://phytozome.jgi.doe.gov/pz/portal.html#!info?alias=Org_Osativa</a>           |
|                                        | LOC_Os07g46990        |           |                     |           | LOC_Os06g05110      |           |                                                                                                                                                                 |
|                                        | LOC_Os08g44770        |           |                     |           |                     |           |                                                                                                                                                                 |
|                                        | LOC_Os03g11960        |           |                     |           |                     |           |                                                                                                                                                                 |
| <i>Zea mays</i>                        | GRMZM2G025992         | 5         | GRMZM2G059991       | 2         | GRMZM5G864424       | 3         | <a href="http://phytozome.jgi.doe.gov/pz/portal.html#!info?alias=Org_Zmays">http://phytozome.jgi.doe.gov/pz/portal.html#!info?alias=Org_Zmays</a>               |
|                                        | GRMZM2G058522         |           | GRMZM2G124455       |           | GRMZM2G042080       |           |                                                                                                                                                                 |
|                                        | GRMZM2G106928         |           |                     |           | GRMZM2G173628       |           |                                                                                                                                                                 |
|                                        | GRMZM2G169890         |           |                     |           |                     |           |                                                                                                                                                                 |
|                                        | GRMZM5G891739         |           |                     |           |                     |           |                                                                                                                                                                 |
| <i>Brachypodium distachyon</i>         | Bradi1g18340          | 3         | Bradi2g30580        | 1         | Bradi1g50550        | 2         | <a href="http://phytozome.jgi.doe.gov/pz/portal.html#!info?alias=Org_Bdistachyon">http://phytozome.jgi.doe.gov/pz/portal.html#!info?alias=Org_Bdistachyon</a>   |
|                                        | Bradi1g69680          |           |                     |           | Bradi1g51140        |           |                                                                                                                                                                 |
|                                        | Bradi3g43070          |           |                     |           |                     |           |                                                                                                                                                                 |
| <i>Sorghum bicolor</i>                 | Sobic.001G371900      | 4         | Sobic.009G093200    | 1         | Sobic.010G012900    | 2         | <a href="http://phytozome.jgi.doe.gov/pz/portal.html#!info?alias=Org_Sbicolor">http://phytozome.jgi.doe.gov/pz/portal.html#!info?alias=Org_Sbicolor</a>         |
|                                        | Sobic.007G166600      |           |                     |           | Sobic.010G033000    |           |                                                                                                                                                                 |
|                                        | Sobic.002G407900      |           |                     |           |                     |           |                                                                                                                                                                 |
|                                        | Sobic.001G453800      |           |                     |           |                     |           |                                                                                                                                                                 |
| <i>Hordeum vulgare</i>                 | MLOC_22278            | 3         | MLOC_72880          | 1         | MLOC_69817          | 2         | <a href="http://plants.ensembl.org/Hordeum_vulgare/Info/Index/">http://plants.ensembl.org/Hordeum_vulgare/Info/Index/</a>                                       |
|                                        | MLOC_38479            |           |                     |           | MLOC_36735          |           |                                                                                                                                                                 |
|                                        | MLOC_17760            |           |                     |           |                     |           |                                                                                                                                                                 |
| <i>Triticum aestivum</i>               | Traes_4AS_8AC85AB54   | 10        | Traes_2AL_D0D84176E | 2         | Traes_7AS_ECBB6F731 | 6         | <a href="http://phytozome.jgi.doe.gov/pz/portal.html#!info?alias=Org-Taestivum_er">http://phytozome.jgi.doe.gov/pz/portal.html#!info?alias=Org-Taestivum_er</a> |
|                                        | Traes_4BL_F765C4AA5   |           | Traes_2DL_F48387F4E |           | Traes_4AL_433F090E0 |           |                                                                                                                                                                 |
|                                        | Traes_4DL_08EEED1A6   |           |                     |           | Traes_7DS_1CE2F67B7 |           |                                                                                                                                                                 |
|                                        | Traes_2AS_529825553   |           |                     |           | Traes_7AS_8400350BF |           |                                                                                                                                                                 |
|                                        | Traes_2BS_6015BC7C6   |           |                     |           | Traes_4AL_7742FFD9E |           |                                                                                                                                                                 |

|                               |                     |   |            |   |                     |   |                                                                                                                                                         |
|-------------------------------|---------------------|---|------------|---|---------------------|---|---------------------------------------------------------------------------------------------------------------------------------------------------------|
|                               | Traes_2DS_3C3A2A12A |   |            |   | Traes_7DS_B5FBEEE92 |   |                                                                                                                                                         |
|                               | Traes_7BL_70F07C889 |   |            |   |                     |   |                                                                                                                                                         |
|                               | Traes_7AL_EAE52A86A |   |            |   |                     |   |                                                                                                                                                         |
|                               | Traes_7BL_A42D6C984 |   |            |   |                     |   |                                                                                                                                                         |
|                               | Traes_7AL_E14A72218 |   |            |   |                     |   |                                                                                                                                                         |
| <i>Setaria italica</i>        | Si031388m           | 4 | Si023127m  | 1 | Si038762m           | 2 | <a href="http://phytozome.jgi.doe.gov/pz/portal.html#!info?alias=Org_Sitalica">http://phytozome.jgi.doe.gov/pz/portal.html#!info?alias=Org_Sitalica</a> |
|                               | Si037512m           |   |            |   | Si007118m           |   |                                                                                                                                                         |
|                               | Si014166m           |   |            |   |                     |   |                                                                                                                                                         |
|                               | Si037598m           |   |            |   |                     |   |                                                                                                                                                         |
| <i>Phalaenopsis equestris</i> | PEQU_04990          | 5 | PEQU_18674 | 1 | PEQU_20491          | 3 | <a href="ftp://ftp.genomics.org.cn/from_BGISZ/20130120/02.annotation/">ftp://ftp.genomics.org.cn/from_BGISZ/20130120/02.annotation/</a>                 |
|                               | PEQU_28621          |   |            |   | PEQU_37345          |   |                                                                                                                                                         |
|                               | PEQU_03550          |   |            |   | PEQU_39485          |   |                                                                                                                                                         |
|                               | PEQU_42061          |   |            |   |                     |   |                                                                                                                                                         |
|                               | PEQU_00184          |   |            |   |                     |   |                                                                                                                                                         |

a: All peptide sequences of sequenced monocots were download from the related genome websites, and the *Arabidopsis* and banana *SOD* protein sequences were used as queries to perform local BLASTp searches to identify *SOD* gene members. We then confirmed all the protein sequences by BLASTp searches in the NCBI for the presences of the conserved *SOD* domains. Redundant genes, chimeric genes and genes with a very small *SOD* domain were excluded.
